# Supplementary material for: Yeast Biodiversity in Vineyard Environments Is Increased by Human Intervention
Source: PLoS One. 2016 Aug 8;11(8):e0160579. doi: 10.1371/journal.pone.0160579 (PMC4976982; doi:10.1371/journal.pone.0160579)
Supplement: S1 Table — (XLSX) [file pone.0160579.s001.xlsx]

## Sheet: Folha1
Island	Location	Number of samples obtained				Total
		Active vineyards		Abandoned vineyards
		2009	2010	2009	2010
S. Maria	1 - Maia	1	1	1	1
	2 - S. Lourenço	1	1	1	1
	3 - Tagarete	1	1	1	1
	4 - Sul	1		1	1
	Total	4	3	4	4	15
S. Miguel	5 - Vila Franca do Campo	1	1	not sampled	not sampled
	6 - Ponta Garça	1	1	not sampled	not sampled
	7 - Faial da Terra	1	1	not sampled	not sampled
	8 - S. Vicente	1	1	not sampled	not sampled
	Total	4	4	0	0	8
Terceira	9 - P. Martins	1	1	1	1
	10 - Salga	1	1	not sampled	not sampled
	11 - Pesqueiro	1		1	not sampled
	12 - Biscoitos	1	1	1	1
	Total	4	3	3	2	12
Graciosa	13 - Vitória	1	1	1	not sampled
	14 - Santa Cruz	1	1	1	not sampled
	15 - Luz	1	1	1	not sampled
	16 - Lagoa	1	1	1	not sampled
	Total	4	4	4	0	12
Pico	17 - Lagidos Norte	1	1	not sampled	not sampled
	18 - Lagidos Sul	1	1	1	1
	19 - Manhenha	1	1	1	1
	20 - Canada das Almas	1	1	1	not sampled
	21 - Outeiro	1	1	1	1
	22 - Candelária	1	1	1	1
	23 - S. Mateus	1	1	1	1
	24 - Terra do Pão	1	1	1	1
	Total	8	8	7	6	29
Faial	25 - Varadouro	1	1	1	1
	26 - Norte Pequeno	1	1	1	not sampled
	27 - Praia do Norte	1	1	not sampled	not sampled
	28 - Capelinhos	1	1	not sampled	not sampled
	Total	4	4	2	1	11
S. Jorge	29 - Ponta do Topo	1	1	not sampled	not sampled
	30 - Fajã de São João	1	1	1	1
	31 - Ribeira da Areia	1	1	1	1
	32 - Fajã dos Vimes	1	1	1	1
	33 - Fajã do Ouvidor	1	1	1	1
	Total	5	5	4	4	18
Total		33	31	24	17	105
